# Supplementary material
Source: PubMed Central journal article supplement (PMC2806902)

**A**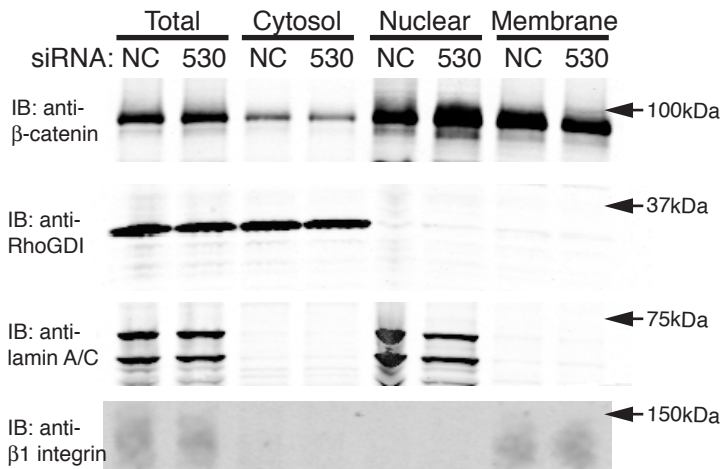**B**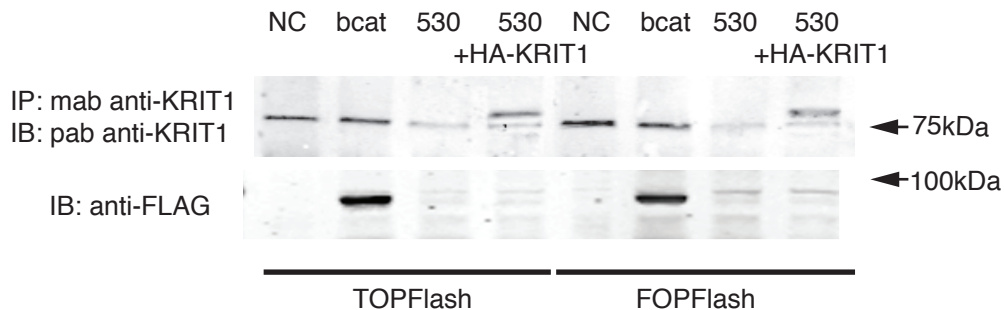

Supplement: supp_3.1-2.73_003293FigS1.pdf [file supp_3.1-2.73_003293FigS1.pdf]

**A**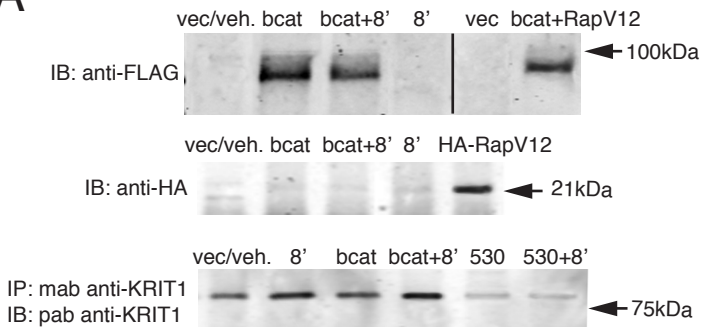**B**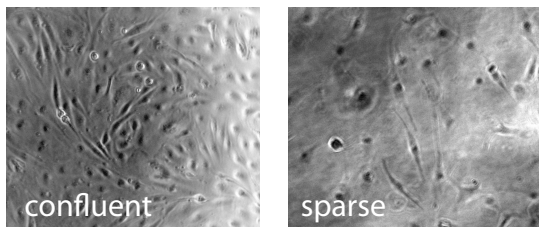**C**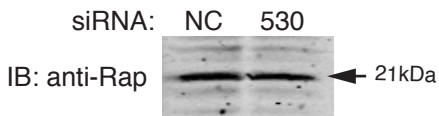

Supplement: supp_3.1-2.73_003293FigS2.pdf [file supp_3.1-2.73_003293FigS2.pdf]
